# Supplementary material
Source: PubMed Central journal article supplement (PMC2141857)

*tfl1-19*

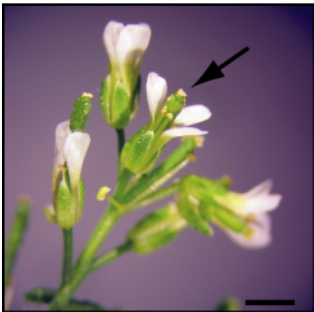

*tfl1-19* complemented  
with *TFL1::TFL1*

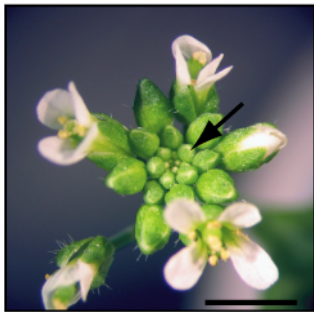

Supplement: pnas_0708236104_2.pdf [file pnas_0708236104_2.pdf]

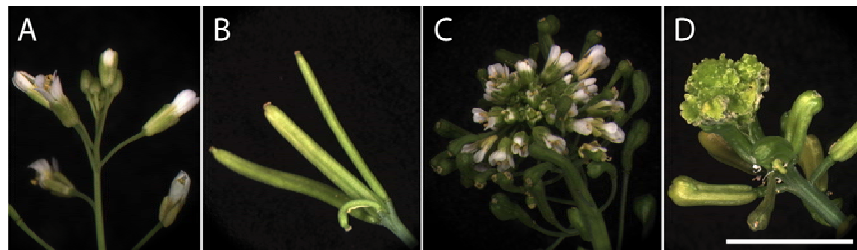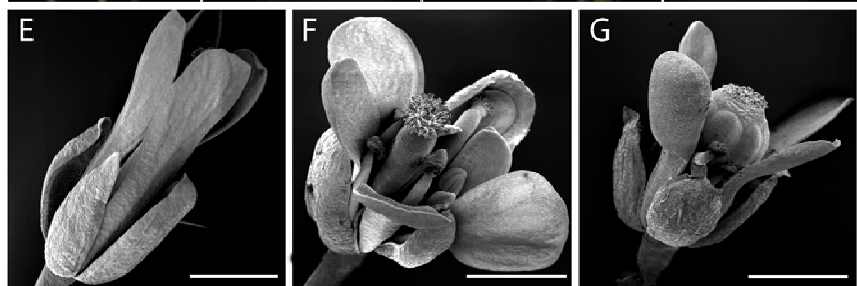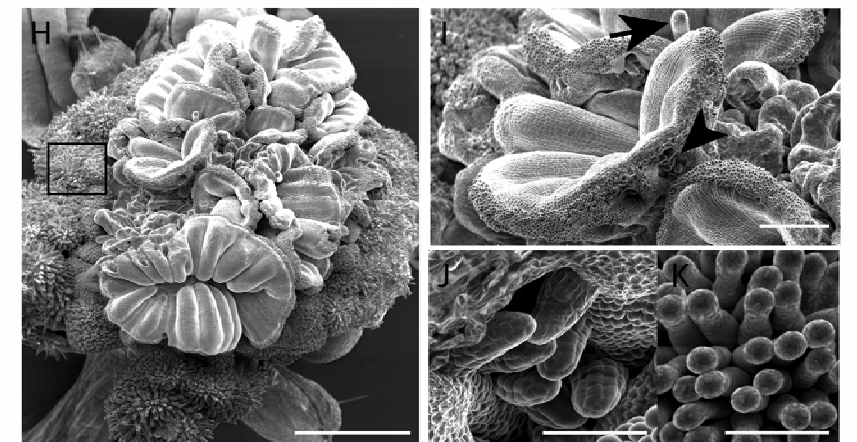

Supplement: pnas_0708236104_3.pdf [file pnas_0708236104_3.pdf]

Vac2

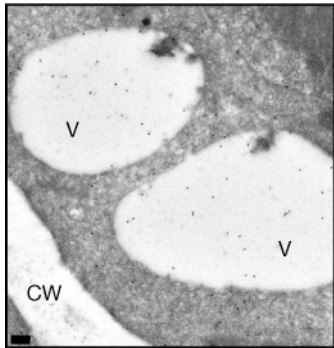

*mtv5*

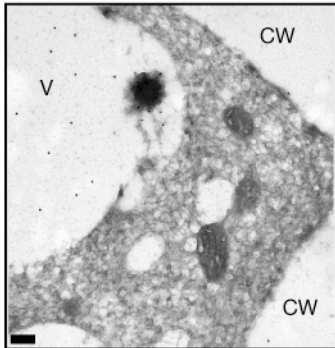

Supplement: pnas_0708236104_4.pdf [file pnas_0708236104_4.pdf]

A

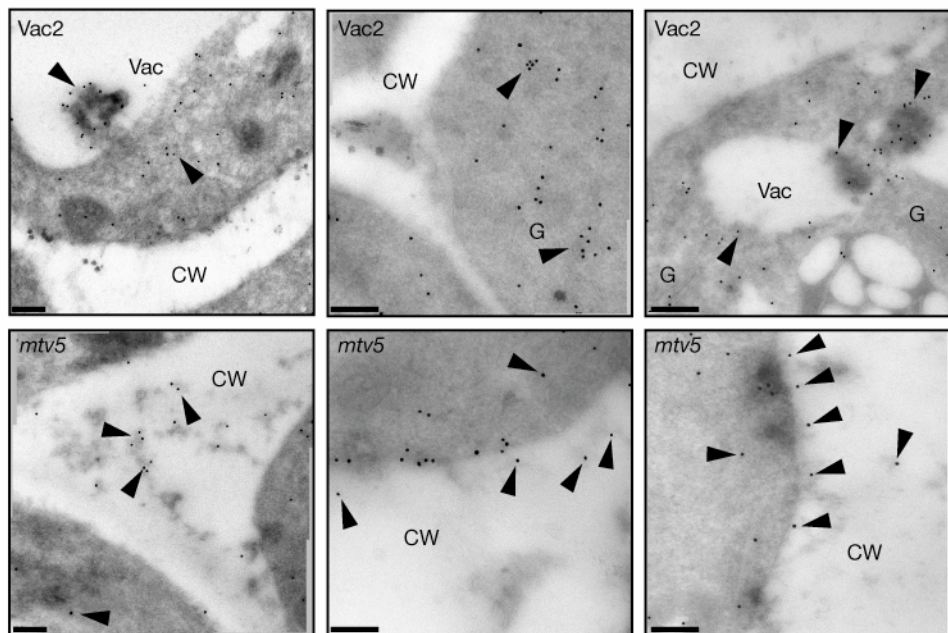

B

|             | <u>Vacuole/Cytoplasm (%)</u> | <u>Cell Wall (%)</u> |
|-------------|------------------------------|----------------------|
| Vac2        | 209 (99.05)                  | 2 (0.95)             |
| <i>mtv5</i> | 55 (46.22)                   | 64 (53.78)           |

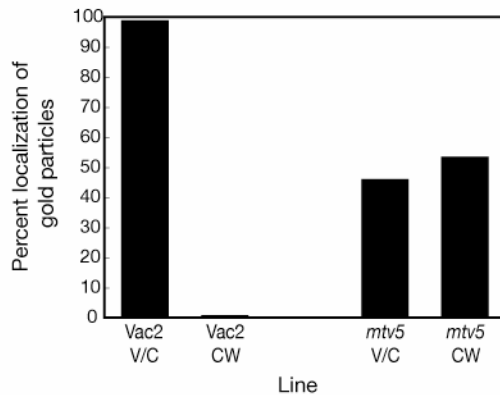

Supplement: pnas_0708236104_5.pdf [file pnas_0708236104_5.pdf]

**A**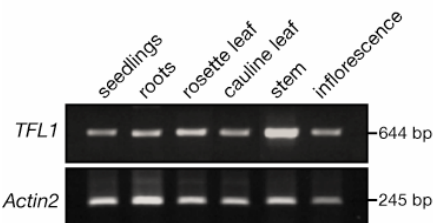**B**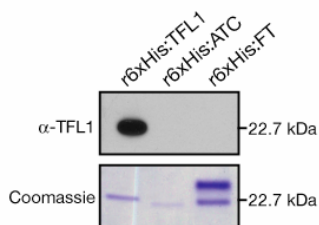**C**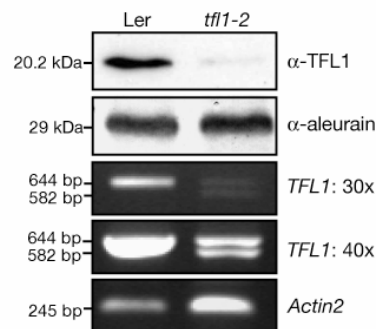**E**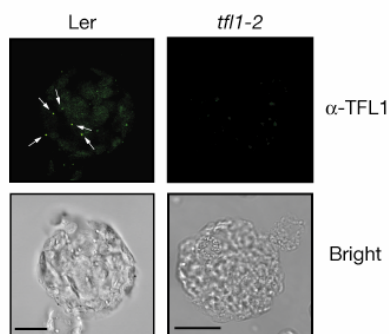**D**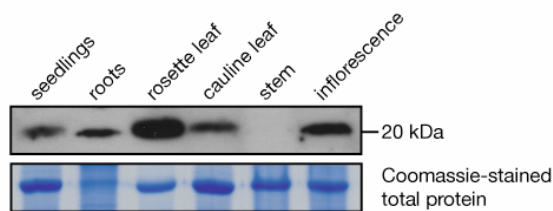**F**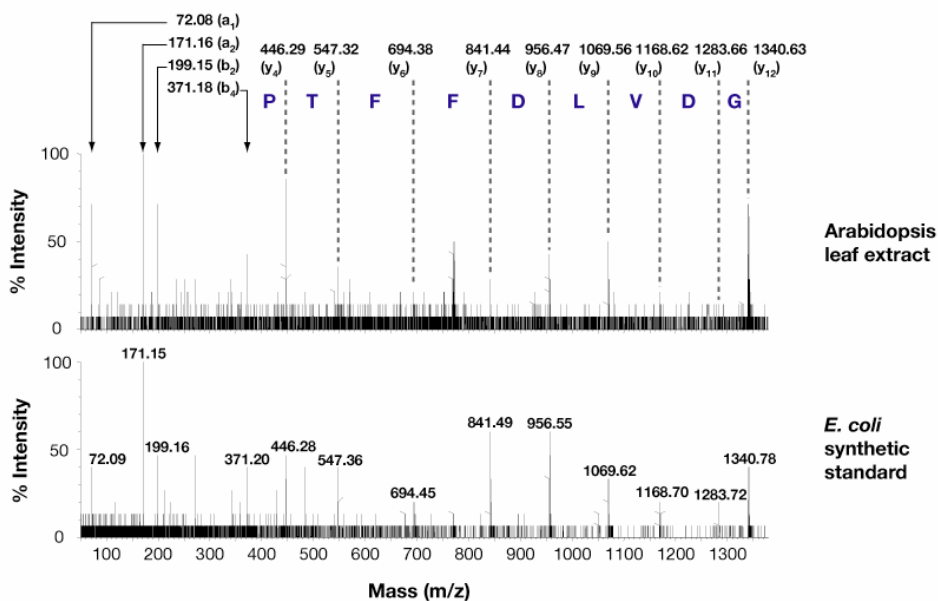

Supplement: pnas_0708236104_6.pdf [file pnas_0708236104_6.pdf]

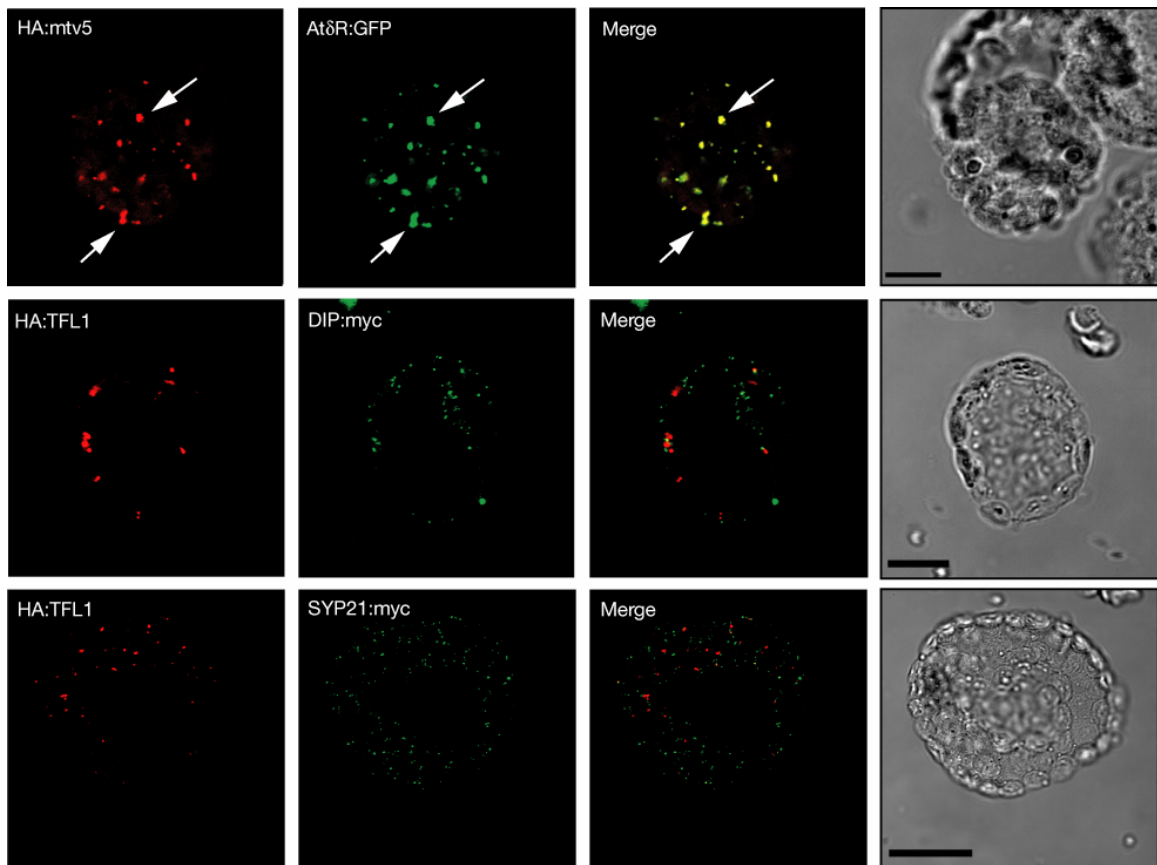

Supplement: pnas_0708236104_7.pdf [file pnas_0708236104_7.pdf]

**A**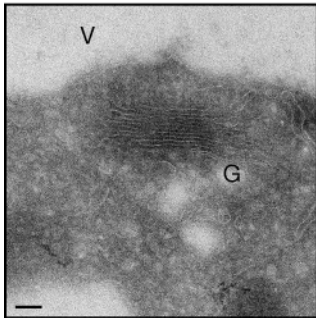**B**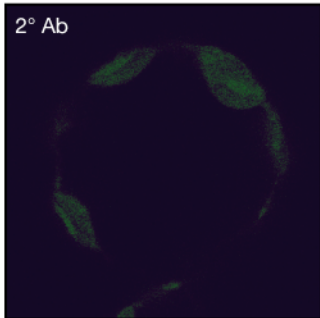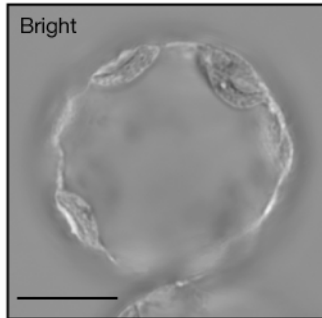

Supplement: pnas_0708236104_8.pdf [file pnas_0708236104_8.pdf]
